# Supplementary material for: The role of hydrophobic, aromatic and electrostatic interactions between amino acid residues and a titanium dioxide surface
Source: Royal Society of Chemistry journal article supplement (doi:10.1039/c8cp05775c), 2018-01-01
Supplement: c8cp05775c1.pdf [file c8cp05775c1.pdf]

## ESI

### **The role of hydrophobic, aromatic and electrostatic interactions between amino acid residues and a titanium dioxide surface**

Avia Leader, Daniel Mandler\* and Meital Reches\*

Institute of Chemistry and the Center for Nanoscience and Nanotechnology, The Hebrew University of Jerusalem, Edmond Safra campus, Jerusalem 919041

\*Corresponding Authors:

Meital Reches, E-mail: [meital.reches@mail.huji.ac.il](mailto:meital.reches@mail.huji.ac.il), Tel: +972-2-6584551, Fax: +972-2-6584501.

Daniel Mandler, E-mail: [daniel.mandler@mail.huji.ac.il](mailto:daniel.mandler@mail.huji.ac.il), Tel: +972-2-6585831, Fax: +972-2-6585319.

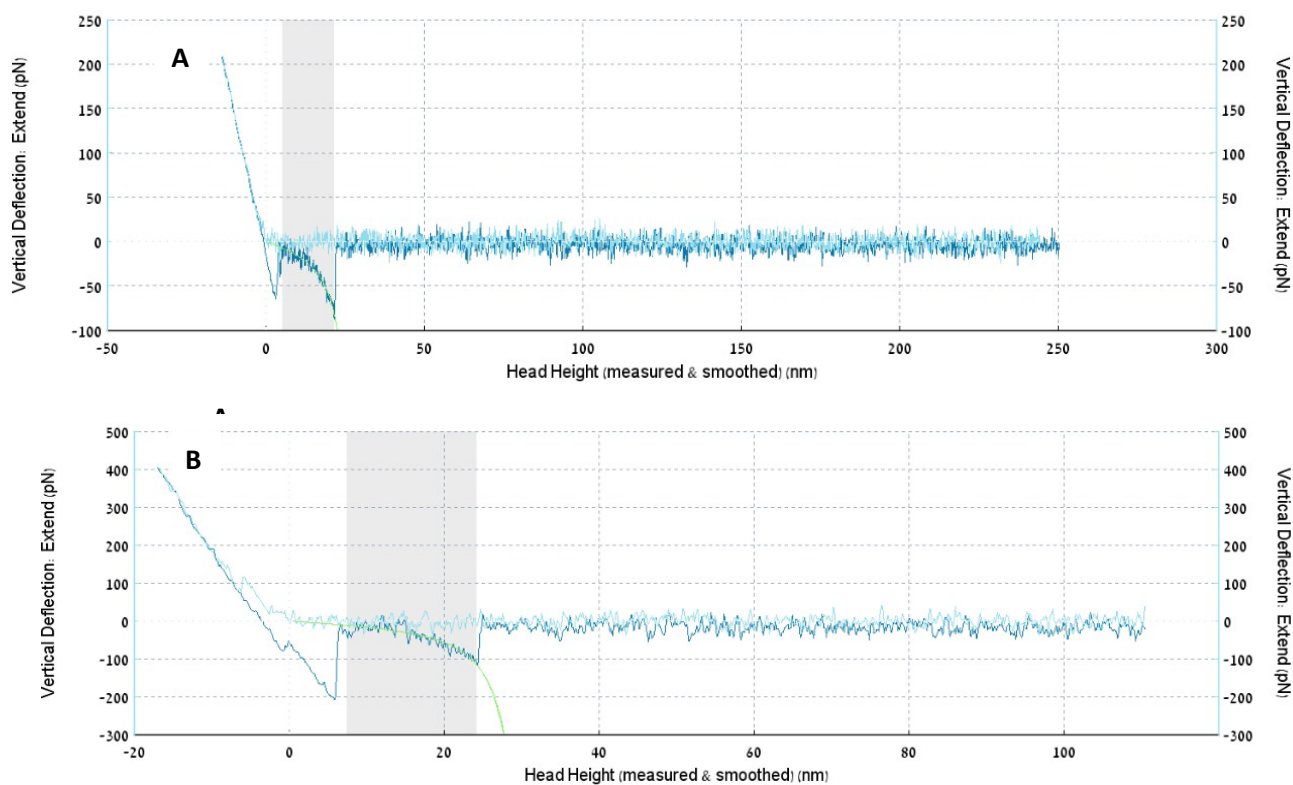

**Figure 13.** Typical force-distance curves fitted with a worm-like chain (WLC) model, between TiO<sub>2</sub> surface and tip modified with studied amino acids in Tris buffer (pH 7.2); (A) Phe, (B) NH<sub>2</sub>-Phe. The fit indicates on a contour length of 30.83 nm and a persistence length of 161.9 pm for Phe, 32.98 nm and 143.6 pm for NH<sub>2</sub>-Phe.

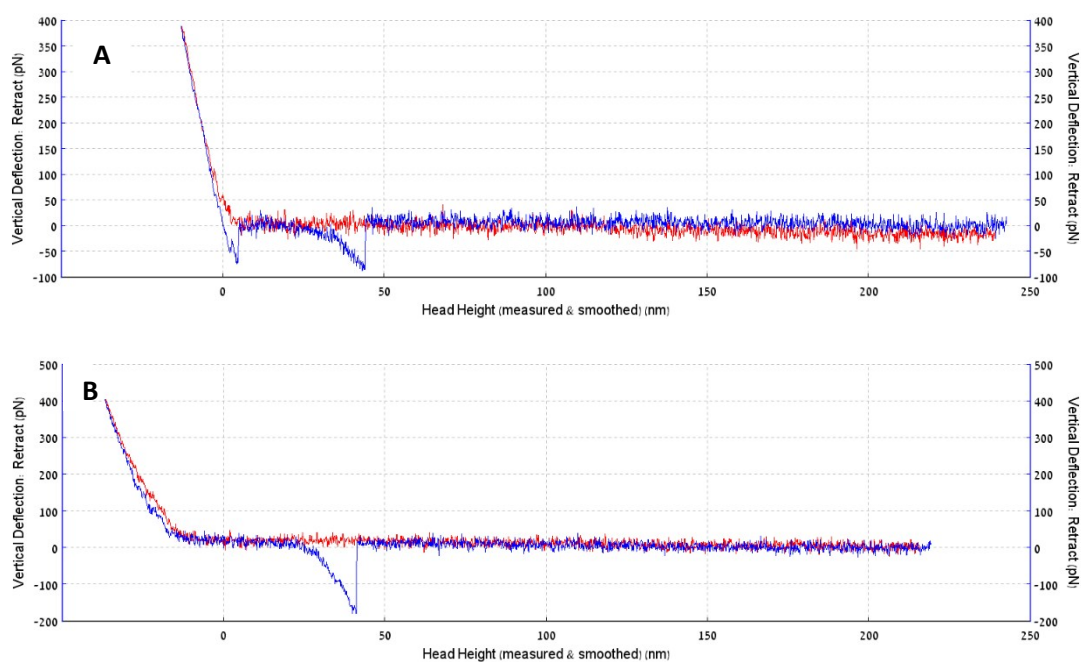

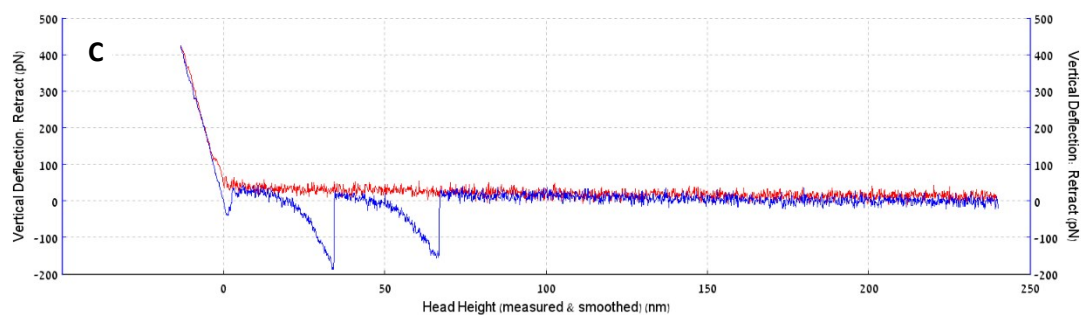

**Figure 25.** Representative force-distance curves between  $\text{TiO}_2$  surface and tip modified with Orn amino acid in Tris buffer (pH 7.2). The red and blue curves indicate approach and retraction signals, respectively. The first peak of the F-D curve (**A-B**) represents the nonspecific interactions between the tip and the surface, while the second peak of the curve represents the adhesion force of the amino acid residue. (**C**) The force distance curve with two peaks both indicating the adhesion events.
